# Supplementary material
Source: Royal Society of Chemistry journal article supplement (doi:10.1039/d6bm00279j)
Supplement: d6bm00279j2.pdf [file d6bm00279j2.pdf]

**Fig. 4c**

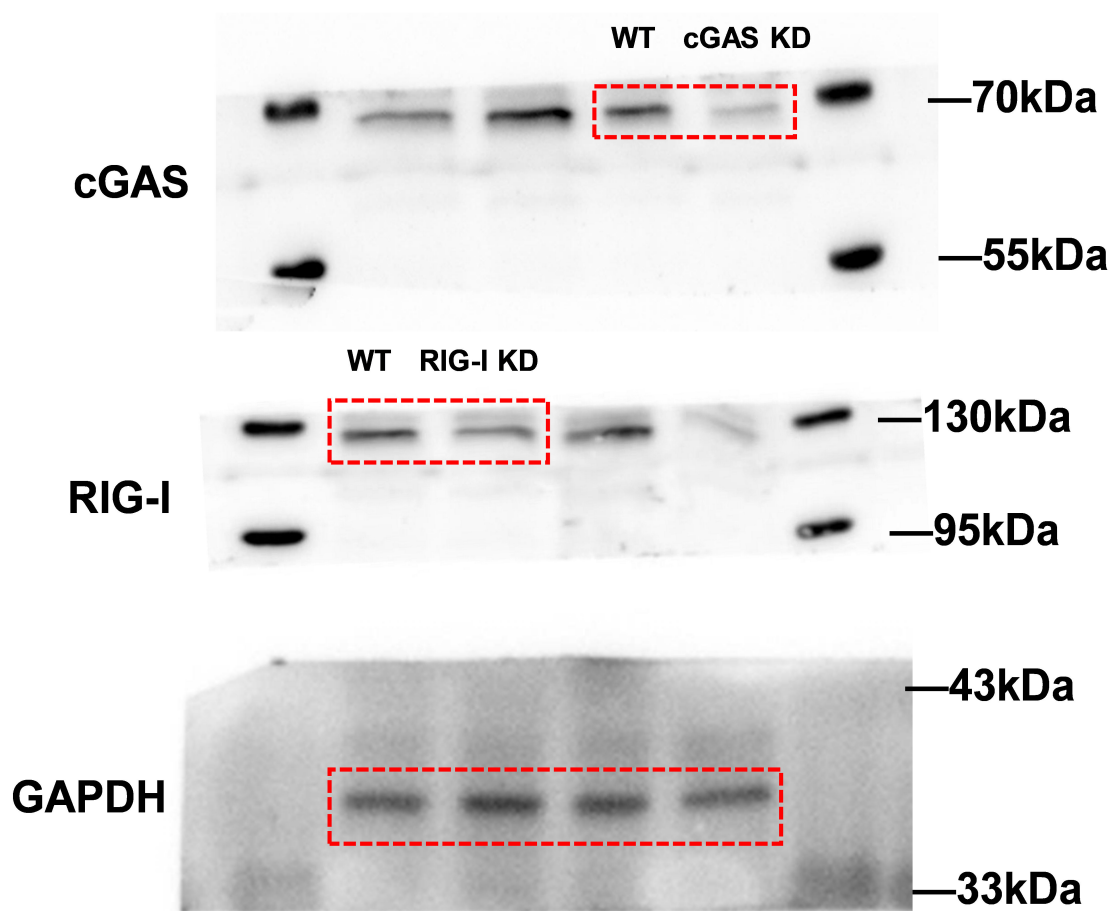

**Fig. 5f**

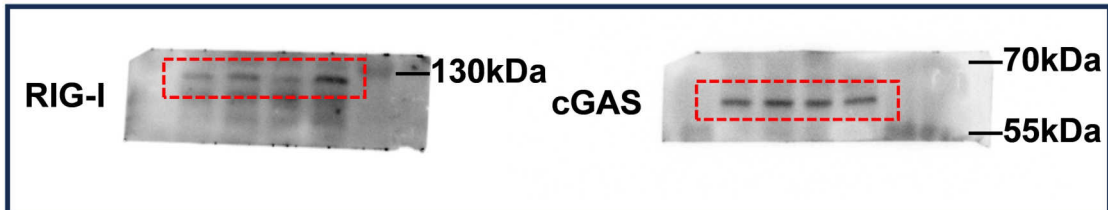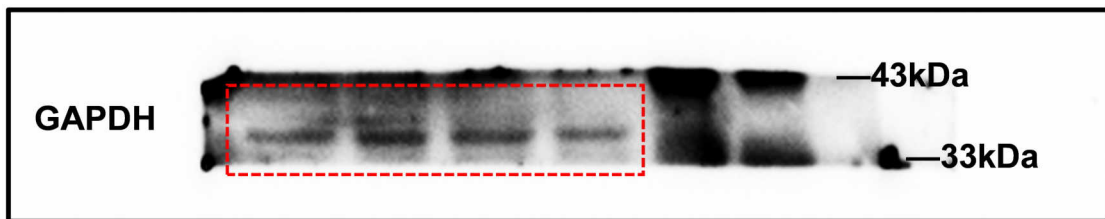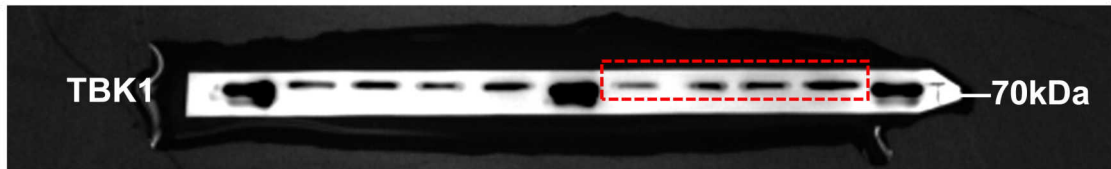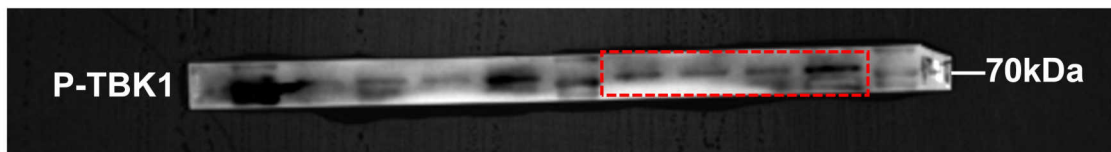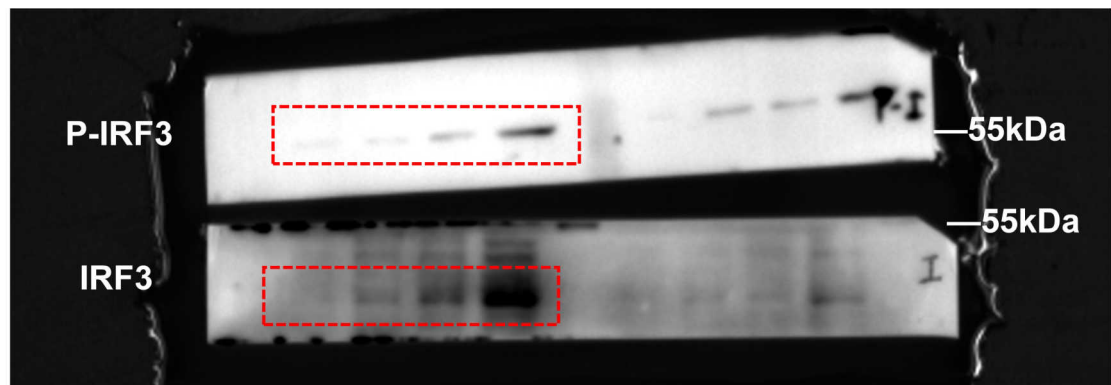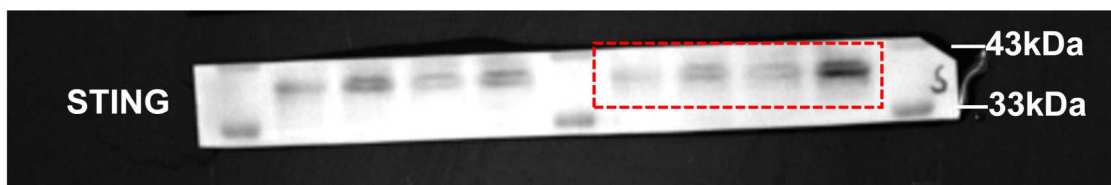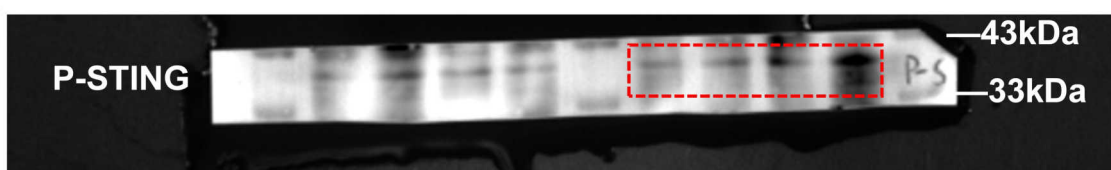

\* Red dashed boxes highlight the lanes of interest. The samples in these lanes are arranged from left to right as: Ctrl, MKA, RT, and RT+MKA.
